CORRECTION

# Correction: Maternal Transfer of the Cyanobacterial Neurotoxin $\beta$ -N-Methylamino-L-Alanine (BMAA) via Milk to Suckling Offspring

Marie Andersson, Oskar Karlsson, Ulrika Bergström, Eva B. Brittebo, Ingvar Brandt

During the preparation of Michaelis-Menten calculations an erroneous factor was included which resulted in erroneous  $K_m$ - and  $V_{max}$  values. The correct apparent  $K_m$ -value for differentiated HC11 cells is 3.1 mM, and the correct apparent  $V_{max}$ -value is 30.4 nmol/mg protein/min.

## Reference

1. Andersson M, Karlsson O, Bergström U, Brittebo EB, Brandt I (2013) Maternal Transfer of the Cyanobacterial Neurotoxin  $\beta$ -N-Methylamino-L-Alanine (BMAA) via Milk to Suckling Offspring. PLoS ONE 8 (10): e78133. doi: [10.1371/journal.pone.0078133](https://doi.org/10.1371/journal.pone.0078133) PMID: [24194910](https://pubmed.ncbi.nlm.nih.gov/24194910/)

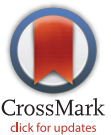

## OPEN ACCESS

**Citation:** Andersson M, Karlsson O, Bergström U, Brittebo EB, Brandt I (2015) Correction: Maternal Transfer of the Cyanobacterial Neurotoxin  $\beta$ -N-Methylamino-L-Alanine (BMAA) via Milk to Suckling Offspring. PLoS ONE 10(7): e0133110. doi:10.1371/journal.pone.0133110

**Published:** July 14, 2015

**Copyright:** © 2015 Andersson et al. This is an open access article distributed under the terms of the [Creative Commons Attribution License](https://creativecommons.org/licenses/by/4.0/), which permits unrestricted use, distribution, and reproduction in any medium, provided the original author and source are credited.
